# Supplementary material
Source: PubMed Central journal article supplement (PMC8588731)
Supplement: 12884_2021_4241_MOESM1_ESM.pdf [file 12884_2021_4241_MOESM1_ESM.pdf]

---

## **Frequency and Source of Worries in an International Sample of Pregnant and Postpartum Women During the COVID-19 Pandemic**

Diego F. Wyszynski, Sonia Hernandez-Diaz, Vanessa Gordon-Dseagu, Noemi Ramiro, Archana Basu, Hannah H. Kim, Karestan C. Koenen

# **Health and Wellbeing of Pregnant and Post-Partum Women During the COVID-19 Pandemic**

## **Questionnaire**

A collaboration of the Harvard T.H. Chan School of Public Health and Pregistry

Principal Investigator: Karestan C. Koenen, PhD (kkoenen@hsph.harvard.edu)

Co-Investigator: Sonia Hernandez-Diaz, MD, DrPh (shernan@hsph.harvard.edu)

Co-Investigator: Diego Wyszynski, MD, MHS, PhD (diegow@pregistry.com)

This document is the property of Pregistry, LLC. It is intended for restricted use only and may not – in full or part – be passed on, reproduced, published or used without express permission of Pregistry, LLC. Copyright © 2020 by Pregistry, LLC. All rights reserved.

## Table of Contents

|                                 |    |
|---------------------------------|----|
| Demographics .....              | 3  |
| COVID-19 Questions.....         | 5  |
| COVID-19 & Media Exposure ..... | 6  |
| Impact of COVID-19 .....        | 6  |
| Support system .....            | 11 |
| Recent Experiences .....        | 12 |
| Feedback .....                  | 13 |

---

## Demographics

**In which country do you live? \***

(Dropdown) options: list of country.

**In which state/province do you live?**

(Text Field)

**In which city do you live?**

(Text Field)

**Are you pregnant? \***

- Yes
- No

(Radio Button)

[If selects "yes"]

**How many weeks pregnant are you? \***

(Dropdown) options: list from 5 to 43.

[If selects "No"]

**How long ago did you give birth? \***

(Dropdown) options: Less than one month ago, One month ago, Two months ago, Three months ago, Four months ago and Five months ago.

**How old are you? \***

(Dropdown) options: list from 18 to 50.

**Which race(s) do you most identify with? (check all that apply)**

- White/Caucasian
- Latin/Hispanic
- Asian
- South Asian
- Black
- Middle Eastern
- Native Hawaiian or Other Pacific Islander
- American Indian or Alaska Native
- Other/Multirace (Text Field)

(Checkbox)

---

**What is your marital status?**

- Single
- Married
- Living with partner
- Separated
- Divorced
- Widowed

(Radio Button)

**How many people live in your household (including yourself)?**

(Dropdown) options: list from 1 to 10 and More than 10.

**What is the highest level of education you attained?**

- Never attended school
- Elementary school
- Some high school
- High school graduate or general equivalency diploma (GED)
- Some college/university
- College diploma or university degree
- Masters degree
- Professional degree
- Doctoral degree.

(Radio Button)

**Please indicate if during the COVID-19 pandemic you:**

- Were a healthcare worker in a hospital or clinic
- Worked in a nursing home
- Were an essential/key worker (as defined by the government)
- None of these
- Don't know

(Radio Button)

**Do you have medical insurance through your government or your employer?**

(Dropdown) options: Yes and No.

---

## COVID-19 Questions

**Have you been tested for SARS-CoV-2 (the virus that causes COVID-19)? If so, what was the result?**

- Positive, I had the virus
- Negative, I did not have the virus
- Yes, but I do not know the result yet or the result was inconclusive
- No, I have not been tested.

(Radio Button)

**Has a health care professional (e.g., doctor, nurse) diagnosed you as having COVID-19 based on your symptoms only?**

(Dropdown) options: No, Yes, and I still have it, Yes, but I recovered.

**Have you been in contact with an individual who has or had COVID-19?**

(Dropdown) options: Yes, No and Maybe.

**Which of the following have you done in the last 7 days to keep yourself and others safe from COVID-19? (Select all that apply)**

- Wore a face mask
- Washed your hands with soap or used hand sanitizer several times per day
- Disinfected surfaces around you
- Stockpiled hand sanitizer or disinfectant wipes
- Stockpiled food or water
- Canceled or postponed air travel for work
- Canceled or postponed air travel for pleasure
- Canceled or postponed work or school activities
- Canceled or postponed personal or social activities
- Avoided contact with people who could be high-risk
- Avoided public spaces, gatherings, or crowds
- Avoided eating at restaurants
- Worked or studied at home
- Visited a doctor
- Canceled a doctor's appointment
- Stockpiled medication
- Prayed

(Checkbox)

## COVID-19 & Media Exposure

|                                                                                          | Never | <1 x/day | 1 x/day | 2-4 x/day | 5-8 x/day | 9-16 x/day | >16 x/day |
|------------------------------------------------------------------------------------------|-------|----------|---------|-----------|-----------|------------|-----------|
| How often do you check the news about COVID-19?                                          | •     | •        | •       | •         | •         | •          | •         |
| How often do you check social media about COVID-19? (e.g. WhatsApp, Facebook)            | •     | •        | •       | •         | •         | •          | •         |
| How often do you discuss COVID-19 in mass communications? (e.g. WhatsApp group, Twitter) | •     | •        | •       | •         | •         | •          | •         |
| How often do you discuss COVID-19 with another person?                                   | •     | •        | •       | •         | •         | •          | •         |

(Radio Button)

## Impact of COVID-19

### How worried are you about COVID-19? \*

(Dropdown) options: Very worried, Somewhat worried, Not very worried, Not worried at all. (skip next question).

[If selects “Not worried at all”]

**(skip next question)**

[If selects anyone from these “Very worried, Somewhat worried, Not very worried”]

### What about COVID-19 makes you most worried? Select all that apply: \*

- That I will get COVID-19
- That my partner will get COVID-19
- That my family members'/friends' will be infected with COVID-19
- That the COVID-19 pandemic will significantly affect my economic situation/finances

- That my unborn baby will get COVID-19
- That COVID-19 will mean changes to my delivery plan
- That my partner/support person will not be able to be with me during delivery because of COVID-19
- That my family will not be able to visit me after delivery
- That my baby will get COVID-19
- That my parents/grandparents will not be able to visit the baby because of measures to stop COVID-19
- That I will not be able to breastfeed because of COVID-19
- Other (Text field)

(Checkbox)

**To what extent has COVID-19 negatively impacted the following areas of your life? \***

|                                          | Not at all | A little bit | Moderately | A lot |
|------------------------------------------|------------|--------------|------------|-------|
| <b>Sleep</b>                             | ●          | ●            | ●          | ●     |
| <b>Diet</b>                              | ●          | ●            | ●          | ●     |
| <b>Fitness</b>                           | ●          | ●            | ●          | ●     |
| <b>Work</b>                              | ●          | ●            | ●          | ●     |
| <b>Finances</b>                          | ●          | ●            | ●          | ●     |
| <b>Family</b>                            | ●          | ●            | ●          | ●     |
| <b>Relationships</b>                     | ●          | ●            | ●          | ●     |
| <b>Religious observance</b>              | ●          | ●            | ●          | ●     |
| <b>Character (e.g., patience, trust)</b> | ●          | ●            | ●          | ●     |

(Radio Button)

Since the COVID-19 pandemic started, how often have any of the following things happened to you?

|                                                                        | Almost every day | At least once a week | A few times a month | Never |
|------------------------------------------------------------------------|------------------|----------------------|---------------------|-------|
| You were treated with less courtesy than other people are              | ●                | ●                    | ●                   | ●     |
| You received poorer service than other people at restaurants or stores | ●                | ●                    | ●                   | ●     |
| People acted as if they are afraid of you                              | ●                | ●                    | ●                   | ●     |
| You were called names or insulted                                      | ●                | ●                    | ●                   | ●     |
| You were threatened or harassed                                        | ●                | ●                    | ●                   | ●     |
| You were physically assaulted                                          | ●                | ●                    | ●                   | ●     |

(Radio Button)

[If selects “Never” for all]

**(skip next question)**

[If selects any of the options except “Never”]

**What do you think is the main reason for these experiences? (Choose all that apply)**

- Your ancestry or national origins
- Your gender
- Your race or ethnicity
- Your age
- Your religion
- Your height
- Your weight
- Your pregnancy
- Your sexual orientation
- Your education or income level
- Other (Text field)

(Checkbox)



Please answer the following questions based on the last 2 weeks.

|                                                                                               | Never | Almost Never | Sometimes | Fairly Often | Very Often |
|-----------------------------------------------------------------------------------------------|-------|--------------|-----------|--------------|------------|
| How often have you felt that you were unable to control the important things in your life?    | ●     | ●            | ●         | ●            | ●          |
| How often have you felt confident about your ability to handle your personal problems?        | ●     | ●            | ●         | ●            | ●          |
| How often have you felt that things were going your way?                                      | ●     | ●            | ●         | ●            | ●          |
| How often have you felt difficulties were piling up so high that you could not overcome them? | ●     | ●            | ●         | ●            | ●          |

(Radio Button)

How often have you been bothered by the following problems during the last 2 weeks? \*

|                                             | Not at all | Several Days | More than half the days | Nearly every day |
|---------------------------------------------|------------|--------------|-------------------------|------------------|
| Feeling nervous, anxious or on edge         | ●          | ●            | ●                       | ●                |
| Not being able to stop or control worrying  | ●          | ●            | ●                       | ●                |
| Feeling down, depressed or hopeless         | ●          | ●            | ●                       | ●                |
| Little interest or pleasure in doing things | ●          | ●            | ●                       | ●                |

(Radio Button)

Since the COVID-19 crisis began, how often do you eat...

|                                                                                        | Almost never<br>or never | Rarely | Sometimes | Often | Almost always<br>or always |
|----------------------------------------------------------------------------------------|--------------------------|--------|-----------|-------|----------------------------|
| Because you're depressed<br>or sad                                                     | •                        | •      | •         | •     | •                          |
| As a way to help you cope                                                              | •                        | •      | •         | •     | •                          |
| As a way to comfort<br>yourself                                                        | •                        | •      | •         | •     | •                          |
| Because you feel<br>worthless or inadequate                                            | •                        | •      | •         | •     | •                          |
| As a way to avoid<br>thinking about something<br>unpleasant or to distract<br>yourself | •                        | •      | •         | •     | •                          |

(Radio Button)

Indicate how much you agree with the following statements \*

|                                                                                                | Strongly<br>disagree | Disagree | Somewhat<br>disagree | Neither<br>agree nor<br>disagree | Somewhat<br>agree | Agree | Strongly<br>agree |
|------------------------------------------------------------------------------------------------|----------------------|----------|----------------------|----------------------------------|-------------------|-------|-------------------|
| I have so much in<br>life to be thankful<br>for                                                | •                    | •        | •                    | •                                | •                 | •     | •                 |
| If I had to list<br>everything that I<br>felt grateful for, it<br>would be a very<br>long list | •                    | •        | •                    | •                                | •                 | •     | •                 |
| I am grateful to a<br>wide variety of<br>people                                                | •                    | •        | •                    | •                                | •                 | •     | •                 |

(Radio Button)

Please describe how the COVID-19 crisis has impacted you the most:

(Text Field)

## Support system

Since the COVID-19 crisis began, how supportive are the following people?

|                              | Not at all | A little bit | Moderately | Quite a bit | Extremely | N/A (there is no such person) |
|------------------------------|------------|--------------|------------|-------------|-----------|-------------------------------|
| Husband or significant other | •          | •            | •          | •           | •         | •                             |
| Parents or legal guardians   | •          | •            | •          | •           | •         | •                             |
| Children                     | •          | •            | •          | •           | •         | •                             |
| Siblings                     | •          | •            | •          | •           | •         | •                             |
| Friends                      | •          | •            | •          | •           | •         | •                             |
| Co-workers                   | •          | •            | •          | •           | •         | •                             |

(Radio Button)

Since the COVID-19 crisis began, how stressed do you feel by the following people?

|                              | Not at all | A little bit | Moderately | Quite a bit | Extremely | N/A (there is no such person) |
|------------------------------|------------|--------------|------------|-------------|-----------|-------------------------------|
| Husband or significant other | •          | •            | •          | •           | •         | •                             |
| Parents or legal guardians   | •          | •            | •          | •           | •         | •                             |
| Children                     | •          | •            | •          | •           | •         | •                             |
| Siblings                     | •          | •            | •          | •           | •         | •                             |
| Friends                      | •          | •            | •          | •           | •         | •                             |
| Co-workers                   | •          | •            | •          | •           | •         | •                             |

(Radio Button)

Since the COVID-19 crisis began... \*

|                                                    | Hardly ever | Some of the time | Often |
|----------------------------------------------------|-------------|------------------|-------|
| How often do you feel that you lack companionship? | •           | •                | •     |
| How often do you feel left out?                    | •           | •                | •     |
| How often do you feel isolated from others?        | •           | •                | •     |

(Radio Button)

## Recent Experiences

Thinking about your experience IN THE PAST 7 DAYS, please indicate how strongly you agree or disagree with each of the following statements

|                                                        | Strongly agree        | Agree                 | Somewhat agree        | Neither agree nor disagree | Somewhat disagree     | Disagree              | Strongly disagree     |
|--------------------------------------------------------|-----------------------|-----------------------|-----------------------|----------------------------|-----------------------|-----------------------|-----------------------|
| I don't feel I belong to anything I'd call a community | <input type="radio"/> | <input type="radio"/> | <input type="radio"/> | <input type="radio"/>      | <input type="radio"/> | <input type="radio"/> | <input type="radio"/> |
| I have something valuable to give the world            | <input type="radio"/> | <input type="radio"/> | <input type="radio"/> | <input type="radio"/>      | <input type="radio"/> | <input type="radio"/> | <input type="radio"/> |
| I feel close to other people in my community           | <input type="radio"/> | <input type="radio"/> | <input type="radio"/> | <input type="radio"/>      | <input type="radio"/> | <input type="radio"/> | <input type="radio"/> |
| I cannot make sense of what's going on in the world    | <input type="radio"/> | <input type="radio"/> | <input type="radio"/> | <input type="radio"/>      | <input type="radio"/> | <input type="radio"/> | <input type="radio"/> |
| My community is a source of comfort                    | <input type="radio"/> | <input type="radio"/> | <input type="radio"/> | <input type="radio"/>      | <input type="radio"/> | <input type="radio"/> | <input type="radio"/> |
| I believe that people are kind                         | <input type="radio"/> | <input type="radio"/> | <input type="radio"/> | <input type="radio"/>      | <input type="radio"/> | <input type="radio"/> | <input type="radio"/> |

(Radio Button)

Please answer the following questions based on the last 7 days

|                                                                                     | Not at all | A little bit | Moderately | Quite a bit | Extremely |
|-------------------------------------------------------------------------------------|------------|--------------|------------|-------------|-----------|
| I feel watchful or on-guard                                                         | •          | •            | •          | •           | •         |
| Other things keep making me think about COVID-19                                    | •          | •            | •          | •           | •         |
| I am aware that I have a lot of feelings about COVID-19, but I don't deal with them | •          | •            | •          | •           | •         |
| I try not to think about COVID-19                                                   | •          | •            | •          | •           | •         |
| I have trouble concentrating                                                        | •          | •            | •          | •           | •         |

(Radio Button)

### Feedback

We would love to receive your feedback about this survey:

(Text Field)
